# Supplementary material for: Overlap Between Constipation and Gastroesophageal Reflux Disease in Japan: Results From an Internet Survey
Source: PubMed Central journal article supplement — J Neurogastroenterol Motil. 2022 Apr 30;28(2):291–302. doi: 10.5056/jnm21065 (PMC8978135; doi:10.5056/jnm21065), 2022-04-30
Supplement: jnm-28-2-291-supple.pdf [file jnm-28-2-291-supple.pdf]

## Supplementary Materials

### Supplementary Method

#### Questionnaire

##### Screening

- What is your gender? Response: Male/Female.
- What is your age? Response: Free text number (years).
- Which prefecture do you currently live in? Response: Free text.
- Are you currently pregnant? Response: Yes/No.
- Have you had any of the following diagnoses or surgeries from your doctor? If not, answer “None.” Response: 1. Hypertension; 2. Diabetes mellitus; 3. Hyperlipidemia; 4. Gastric and small intestinal inflammation, such as gastric ulcer and duodenal ulcer; 5. Inflammatory bowel disease/ulcerative colitis/Crohn’s disease; 6. Hemorrhoidal disease; 7. Diverticulitis/diverticulosis; 8. Cancer of the gastrointestinal tract; 9. Other cancers; 10. Cerebrovascular disease/neurological disease, such as cerebral infarction; 11. Chronic obstructive pulmonary disease; 12. Liver disease; 13. Kidney disease; 14. Other diseases; 15. Abdominal surgery other than appendicitis.

##### Main Survey

- What is your current occupation? Response: 1. Company staff/civil servant; 2. Self-employed/freelancer; 3. Part-time; 4. Homemaker; 5. Retired/unemployed; 6. Student; 7. Other.
- What is your net annual household income? Response: 1. < 3 million yen; 2. 3-< 4 million yen; 3. 4-< 6 million yen; 4. 6-< 8 million yen; 5. 8-< 10 million yen; 6. 10-< 15 million yen; 7. 15-< 20 million yen; 8. 20-25 million yen; 9. > 25 million yen; 10. I don’t want to answer/I don’t know.
- What is your highest academic qualification? Response: 1. Graduated from junior high school; 2. Graduated from senior high school; 3. Graduated from a specialized school; 4. Graduated from technical college; 5. Graduated from junior college; 6. Graduated from university (four-year system); 7. Post-graduate qualification; 8. Other.
- What are your height and weight? Response: Free text number (height cm, weight kg).
- Do you often think you are constipated? Response: Often/sometimes/neither/rarely/never.
- Are you taking medicines related to the stomach or esophagus (such as drugs that suppress stomach acid)? Response (multiple items can be selected): 1. Proton pump inhibitors; 2. Potassium ion-competitive acid blockers; 3. Histamine H2 receptor blockers; 4. Gastrointestinal motility activators; 5. Chinese herbs; 6. Other drugs related to stomach and esophagus; 7. Yes but I don’t remember the name; 8. No, I don’t take drugs related to stomach and esophagus.
- Please answer Yes or No to each of the following items: I am taking medicine to reduce blood pressure; I am taking insulin injections or drugs to reduce blood glucose; I am taking medicine to lower cholesterol; I have previously had a stroke (cerebral hemorrhage, cerebral infarction or neurological disease) or received treatment by a doctor; I am receiving treatment for depression or anxiety by a doctor; I have been diagnosed with anemia by a doctor.
- Please answer Yes or No to each of the following items: I am taking oral medication for Parkinson’s disease; I am taking oral medication for epilepsy; I am taking oral antidepressants; I am taking oral medication for anxiety disorders and hypnotics; I am taking oral iron and iron supplements.
- Are you satisfied with your current bowel movements? Response: Very satisfied/somewhat satisfied/neither/somewhat dissatisfied/very dissatisfied.
- Are you currently taking constipation medication or laxatives or using enemas? Response: Yes/No.
- If you answered yes, select all the drugs you are currently taking or using. Response (multiple items can be selected): 1. Irritant laxatives; 2. Enemas/suppositories; 3. Magnesium saline laxatives; 4. Osmotic laxatives; 5. Inflatable laxatives; 6. Chloride channel activators, guanylate Cyclase C agonists or ileal bile acid transporter inhibitors; 7. Polyethylene glycols; 8. Other constipation drugs and laxatives with specific names; 9. Oral medication but I don’t remember the name.
- Are you satisfied with your current constipation medication? Response: Very satisfied/somewhat satisfied/neither/somewhat dissatisfied/very dissatisfied.
- How do you obtain constipation medication and laxatives? Response (multiple items can be selected): 1. Purchased in pharmacies; 2. Prescribed by physicians; 3. Purchased via internet; 4. Other methods.
- Please answer whether you would / would not pay the following amounts per month (including tax) for a constipation drug: 1.  $\geq$  5000 yen; 2. 3000-4999 yen; 3. 1000-2999 yen; 4. Not more than 999 yen.

Other questions included in the survey were related to Rome IV criteria,<sup>1</sup> the Gastroesophageal Reflux Disease Questionnaire,<sup>2</sup> the Gastrointestinal Symptom Rating Scale,<sup>3</sup> the 8-item Short Form Health Survey Questionnaire,<sup>4</sup> the Constipation Scoring System,<sup>5</sup> and the Frequency Scale for the Symptoms of gastroesophageal reflux disease,<sup>6</sup> for a total of 39 items.

## References

1. Lacy BE, Mearin F, Chang L, et al. Bowel disorders. *Gastroenterol* 2016;150:1393-1407.
2. Jones R, Junghard O, Dent J, et al. Development of the GerdQ, a tool for the diagnosis and management of gastro-oesophageal reflux disease in primary care. *Aliment Pharmacol Ther* 2009;30:1030-1038.
3. Svedlund J, Sjödin I, Dotevall G. GSRS—a clinical rating scale for gastrointestinal symptoms in patients with irritable bowel syndrome and peptic ulcer disease. *Dig Dis Sci* 1988;33:129-134.
4. Tokuda Y, Okubo T, Ohde S, et al. Assessing items on the SF-8 Japanese version for health-related quality of life: a psychometric analysis based on the nominal categories model of item response theory. *Value Health* 2009;12:568-573.
5. Agachan F, Chen T, Pfeifer J, Reissman P, Wexner SD. A constipation scoring system to simplify evaluation and management of constipated patients. *Dis Colon Rectum* 1996;39:681-685.
6. Kusano M, Shimoyama Y, Sugimoto S, et al. Development and evaluation of FSSG: frequency scale for the symptoms of GERD. *J Gastroenterol* 2004;39:888-891.

**Supplementary Table 1.** Participants' Characteristics

| Characteristics                      | Total (N = 10 000) |
|--------------------------------------|--------------------|
| Sex                                  |                    |
| Male                                 | 5023 (50.2)        |
| Female                               | 4977 (49.8)        |
| Age (yr)                             | 46.0 ± 13.4        |
| ≥ 20 and < 30                        | 1566               |
| ≥ 30 and < 40                        | 1879               |
| ≥ 40 and < 50                        | 2365               |
| ≥ 50 and < 60                        | 1971               |
| ≥ 60 and < 70                        | 2219               |
| Height (cm) <sup>a</sup>             | 164.6 ± 8.5        |
| Weight (kg) <sup>a</sup>             | 60.9 ± 12.5        |
| Body mass index (kg/m <sup>2</sup> ) | 22.3 ± 3.5         |
| Place of residence                   |                    |
| Hokkaido                             | 473 (4.7)          |
| Tohoku                               | 623 (6.2)          |
| Kanto                                | 3537 (35.4)        |
| Chubu                                | 1698 (17.0)        |
| Kinki                                | 2120 (21.2)        |
| Chugoku                              | 541 (5.4)          |
| Shikoku                              | 287 (2.9)          |
| Kyushu                               | 721 (7.2)          |
| Occupation                           |                    |
| Company employee                     | 5206               |
| Self-employed/freelancer             | 795                |
| Part-time worker                     | 1533               |
| Full-time homemaker                  | 1382               |
| Retirement or unemployed             | 788                |
| Student                              | 178                |
| Other                                | 118                |
| Annual household income (¥)          |                    |
| < 6 million                          | 4630               |
| ≥ 6 million                          | 3483               |
| Prefer not to answer                 | 1000               |
| Do not know                          | 887                |
| Highest educational attainment       |                    |
| Junior high school                   | 187                |
| High school diploma                  | 2743               |
| Special training school              | 706                |
| Technical college                    | 508                |
| Junior college                       | 1092               |
| University (4-year system)           | 4153               |
| Post-graduate qualification          | 540                |
| Other                                | 71                 |

**Supplementary Table 1.** Continued

| Characteristics                           | Total (N = 10 000) |
|-------------------------------------------|--------------------|
| Complications                             |                    |
| Hypertension                              | 1187               |
| Diabetes mellitus                         | 435                |
| Hyperlipidemia                            | 702                |
| Gastroduodenal ulcers                     | 597                |
| Hemorrhoidal disease                      | 455                |
| Diverticulosis                            | 68                 |
| Other cancers                             | 81                 |
| Cerebrovascular and neurological diseases | 106                |
| Chronic obstructive pulmonary disease     | 11                 |
| Liver disease                             | 150                |
| Kidney disease                            | 146                |
| Other                                     | 245                |
| None                                      | 7182               |

<sup>a</sup>Includes 0.3% overall outlier removal to exclude obvious data entry errors. Values are presented as n (%), mean ± SD, or n.

**Supplementary Table 2.** Results of the Gastroesophageal Reflux Disease Questionnaire (Participants With Narrow-sense Gastroesophageal Reflux Disease, N = 1223)

| Symptoms in the previous week                                                                                       | Symptom presence (day) | Score | n (%)      |
|---------------------------------------------------------------------------------------------------------------------|------------------------|-------|------------|
| 1. How often did you have a burning feeling behind your breastbone (heartburn)?                                     | 0                      | 0     | 299 (24.4) |
|                                                                                                                     | 1                      | 1     | 449 (36.7) |
|                                                                                                                     | 2-3                    | 2     | 338 (27.6) |
|                                                                                                                     | 4-7                    | 3     | 137 (11.2) |
| 2. How often did you have stomach contents (liquid or food) moving upwards to your throat or mouth (regurgitation)? | 0                      | 0     | 212 (17.3) |
|                                                                                                                     | 1                      | 1     | 468 (38.3) |
|                                                                                                                     | 2-3                    | 2     | 401 (32.8) |
|                                                                                                                     | 4-7                    | 3     | 142 (11.6) |
| 3. How often did you have a pain in the centre of the upper stomach area?                                           | 0                      | 3     | 861 (70.4) |
|                                                                                                                     | 1                      | 2     | 179 (14.6) |
|                                                                                                                     | 2-3                    | 1     | 123 (10.1) |
|                                                                                                                     | 4-7                    | 0     | 60 (4.9)   |
| 4. How often did you have nausea?                                                                                   | 0                      | 3     | 807 (66.0) |
|                                                                                                                     | 1                      | 2     | 250 (20.4) |
|                                                                                                                     | 2-3                    | 1     | 107 (8.7)  |
|                                                                                                                     | 4-7                    | 0     | 59 (4.8)   |
| 5. How often did you have trouble getting a good night's sleep because of Heartburn or regurgitation?               | 0                      | 0     | 604 (49.4) |
|                                                                                                                     | 1                      | 1     | 372 (30.4) |
|                                                                                                                     | 2-3                    | 2     | 169 (13.8) |
|                                                                                                                     | 4-7                    | 3     | 78 (6.4)   |
| 6. How often did you have a need for over-the-counter medicine for heartburn or regurgitation?                      | 0                      | 0     | 693 (56.7) |
|                                                                                                                     | 1                      | 1     | 241 (19.7) |
|                                                                                                                     | 2-3                    | 2     | 153 (12.5) |
|                                                                                                                     | 4-7                    | 3     | 136 (11.1) |

**Supplementary Table 3.** Participants Meeting the Criteria for Chronic Constipation According to Japanese Guidelines Were Not Always Aware of Having Constipation

| Category                                              | Awareness of constipation |      |        |
|-------------------------------------------------------|---------------------------|------|--------|
|                                                       | Yes                       | No   | Total  |
| Chronic constipation according to Japanese guidelines |                           |      |        |
| With constipation                                     | 1948                      | 1856 | 3804   |
| Without constipation                                  | 615                       | 5581 | 6196   |
| Total                                                 | 2563                      | 7437 | 10 000 |

Values are presented as n.

**Supplementary Table 4.** Participants' Socioeconomic Characteristics According to the Presence of Chronic Constipation and Narrow-sense Gastroesophageal Reflux Disease

| Characteristic                 | Chronic constipation guidelines/narrow-sense GERD |                                             |                                    |                                                       | Total<br>(N = 10 000) |
|--------------------------------|---------------------------------------------------|---------------------------------------------|------------------------------------|-------------------------------------------------------|-----------------------|
|                                | Group A:<br>constipation and<br>GERD (n = 693)    | Group B:<br>constipation only<br>(n = 3111) | Group C:<br>GERD only<br>(n = 530) | Group D:<br>no constipation,<br>no GERD<br>(n = 5666) |                       |
| Place of residence             |                                                   |                                             |                                    |                                                       |                       |
| Hokkaido                       | 40 (5.8)                                          | 143 (4.6)                                   | 21 (4.0)                           | 269 (4.7)                                             | 473                   |
| Tohoku                         | 49 (7.1)                                          | 192 (6.2)                                   | 35 (6.6)                           | 347 (6.1)                                             | 623                   |
| Kanto                          | 224 (32.3)                                        | 1095 (35.2)                                 | 187 (35.3)                         | 2031 (35.8)                                           | 3537                  |
| Chubu                          | 120 (17.3)                                        | 516 (16.6)                                  | 97 (18.3)                          | 965 (17.0)                                            | 1698                  |
| Kinki                          | 148 (21.4)                                        | 665 (21.4)                                  | 105 (19.8)                         | 1202 (21.2)                                           | 2120                  |
| Chugoku                        | 33 (4.8)                                          | 169 (5.4)                                   | 24 (4.5)                           | 315 (5.6)                                             | 541                   |
| Shikoku                        | 22 (3.2)                                          | 94 (3.0)                                    | 10 (1.9)                           | 161 (2.8)                                             | 287                   |
| Kyushu                         | 57 (8.2)                                          | 237 (7.6)                                   | 51 (9.6)                           | 376 (6.6)                                             | 721                   |
| Occupation                     |                                                   |                                             |                                    |                                                       |                       |
| Company employee               | 381 (55.0)                                        | 1556 (50.0)                                 | 292 (55.1)                         | 2977 (52.5)                                           | 5206                  |
| Self-employed/freelancer       | 47 (6.8)                                          | 228 (7.3)                                   | 53 (10.0)                          | 467 (8.2)                                             | 795                   |
| Part-time worker               | 112 (16.2)                                        | 501 (16.1)                                  | 59 (11.1)                          | 861 (15.2)                                            | 1533                  |
| Full-time homemaker            | 84 (12.1)                                         | 506 (16.3)                                  | 67 (12.6)                          | 725 (12.8)                                            | 1382                  |
| Retirement or unemployed       | 56 (8.1)                                          | 228 (7.3)                                   | 49 (9.2)                           | 455 (8.0)                                             | 788                   |
| Student                        | 8 (1.2)                                           | 58 (1.9)                                    | 3 (0.6)                            | 109 (1.9)                                             | 178                   |
| Other                          | 5 (0.7)                                           | 34 (1.1)                                    | 7 (1.3)                            | 72 (1.3)                                              | 118                   |
| Annual household income (¥)    |                                                   |                                             |                                    |                                                       |                       |
| < 6 million                    | 336 (48.5)                                        | 1564 (50.3)                                 | 259 (48.9)                         | 2471 (43.6)                                           | 4630                  |
| ≥ 6 million                    | 252 (36.4)                                        | 1007 (32.4)                                 | 195 (36.8)                         | 2029 (35.8)                                           | 3483                  |
| Prefer not to answer           | 54 (7.8)                                          | 269 (8.6)                                   | 39 (7.4)                           | 638 (11.3)                                            | 1000                  |
| Do not know                    | 51 (7.4)                                          | 271 (8.7)                                   | 37 (7.0)                           | 528 (9.3)                                             | 887                   |
| Highest educational attainment |                                                   |                                             |                                    |                                                       |                       |
| Junior high school             | 15 (2.2)                                          | 67 (2.2)                                    | 12 (2.3)                           | 93 (1.6)                                              | 187                   |
| High school diploma            | 190 (27.4)                                        | 853 (27.4)                                  | 147 (27.7)                         | 1553 (27.4)                                           | 2743                  |
| Special training school        | 55 (7.9)                                          | 223 (7.2)                                   | 34 (6.4)                           | 394 (7.0)                                             | 706                   |
| Technical college              | 45 (6.5)                                          | 153 (4.9)                                   | 32 (6.0)                           | 278 (4.9)                                             | 508                   |
| Junior college                 | 67 (9.7)                                          | 411 (13.2)                                  | 48 (9.1)                           | 566 (10.0)                                            | 1092                  |
| University (4-year system)     | 286 (41.3)                                        | 1238 (39.8)                                 | 232 (43.8)                         | 2397 (42.3)                                           | 4153                  |
| Post-graduate qualification    | 30 (4.3)                                          | 133 (4.3)                                   | 23 (4.3)                           | 354 (6.2)                                             | 540                   |
| Other                          | 5 (0.7)                                           | 33 (1.1)                                    | 2 (0.4)                            | 31 (0.5)                                              | 71                    |

GERD, gastroesophageal reflux disease.  
Values are presented as n (%).

**Supplementary Table 5.** Eight-item Short Form Health Survey Questionnaire and Gastrointestinal Symptom Rating Scale Scores According to the Presence of Chronic Constipation and the Presence of Narrow-sense Gastroesophageal Reflux Disease

| Score                      | Chronic constipation guidelines/narrow-sense GERD |                                             |                                    |                                                       | Total<br>(N = 10 000) |
|----------------------------|---------------------------------------------------|---------------------------------------------|------------------------------------|-------------------------------------------------------|-----------------------|
|                            | Group A:<br>constipation and<br>GERD<br>(n = 693) | Group B:<br>constipation only<br>(n = 3111) | Group C:<br>GERD only<br>(n = 530) | Group D:<br>no constipation,<br>no GERD<br>(n = 5666) |                       |
| SF-8 score                 |                                                   |                                             |                                    |                                                       |                       |
| Physical functioning       | 48.4 ± 6.6                                        | 50.7 ± 5.8                                  | 49.7 ± 6.3                         | 51.8 ± 5.2                                            | 51.1 ± 5.7            |
| Role physical              | 47.7 ± 7.5                                        | 50.8 ± 6.1                                  | 50.1 ± 6.3                         | 52.1 ± 5.7                                            | 51.2 ± 6.2            |
| Bodily pain                | 46.0 ± 8.8                                        | 49.8 ± 8.6                                  | 48.0 ± 8.4                         | 52.6 ± 7.8                                            | 51.1 ± 8.4            |
| General health             | 46.4 ± 7.4                                        | 50.5 ± 6.6                                  | 49.0 ± 7.0                         | 53.0 ± 6.4                                            | 51.5 ± 6.9            |
| Vitality                   | 47.5 ± 6.7                                        | 50.1 ± 6.2                                  | 49.2 ± 6.4                         | 52.3 ± 5.7                                            | 51.1 ± 6.2            |
| Social functioning         | 46.6 ± 7.9                                        | 50.1 ± 6.9                                  | 49.2 ± 7.2                         | 52.0 ± 5.9                                            | 50.9 ± 6.6            |
| Role emotional             | 46.1 ± 7.7                                        | 49.0 ± 7.1                                  | 48.3 ± 7.3                         | 51.3 ± 6.1                                            | 50.1 ± 6.8            |
| Mental health              | 45.0 ± 8.0                                        | 48.2 ± 7.5                                  | 48.1 ± 7.8                         | 51.3 ± 6.7                                            | 49.7 ± 7.4            |
| Physical component summary | 47.0 ± 7.1                                        | 50.1 ± 6.3                                  | 48.6 ± 6.6                         | 51.5 ± 5.8                                            | 50.6 ± 6.2            |
| Mental component summary   | 44.9 ± 7.7                                        | 47.7 ± 7.5                                  | 47.5 ± 7.6                         | 50.4 ± 6.4                                            | 49.0 ± 7.1            |
| GSRS score                 |                                                   |                                             |                                    |                                                       |                       |
| Total                      | 2.8 ± 1.1                                         | 1.9 ± 0.8                                   | 2.1 ± 1.0                          | 1.3 ± 0.5                                             | 1.7 ± 0.8             |
| Acid Regurgitation         | 2.8 ± 1.3                                         | 1.5 ± 0.8                                   | 2.4 ± 1.2                          | 1.2 ± 0.5                                             | 1.5 ± 0.9             |
| Abdominal pain             | 2.5 ± 1.3                                         | 1.6 ± 0.9                                   | 2.0 ± 1.1                          | 1.3 ± 0.6                                             | 1.5 ± 0.9             |
| Dyspepsia                  | 2.8 ± 1.2                                         | 1.9 ± 1.0                                   | 2.1 ± 1.1                          | 1.4 ± 0.6                                             | 1.7 ± 0.9             |
| Diarrhea                   | 2.7 ± 1.4                                         | 1.9 ± 1.2                                   | 2.2 ± 1.4                          | 1.5 ± 0.9                                             | 1.7 ± 1.1             |
| Constipation               | 3.2 ± 1.4                                         | 2.5 ± 1.3                                   | 1.8 ± 1.0                          | 1.4 ± 0.7                                             | 1.9 ± 1.2             |

GERD, gastroesophageal reflux disease; SF-8, 8-item Short Form Health Survey Questionnaire; GSRS, Gastrointestinal Symptom Rating Scale. Values are presented as mean ± SD.

**Supplementary Table 6.** Concomitant Use of Gastric and Constipation Drugs

| Type of constipation medication                                                             | Type of gastric medication |           |                               |                  |             |           |               |                        | Total |
|---------------------------------------------------------------------------------------------|----------------------------|-----------|-------------------------------|------------------|-------------|-----------|---------------|------------------------|-------|
|                                                                                             | PPI                        | PCAB      | Histamine H2 receptor blocker | Prokinetic agent | Herbal drug | Other     | Unknown, oral | No oral administration |       |
| Stimulant laxatives                                                                         | 85 (60.7)                  | 18 (31.0) | 56 (49.1)                     | 9 (18.8)         | 20 (29.0)   | 14 (27.5) | 12 (24.5)     | 233 (39.2)             | 447   |
| Enemas and suppositories                                                                    | 11 (7.9)                   | 18 (31.0) | 14 (12.3)                     | 7 (14.6)         | 10 (14.5)   | 4 (7.8)   | 4 (8.2)       | 52 (8.8)               | 120   |
| Saline laxatives                                                                            | 23 (16.4)                  | 10 (17.2) | 28 (24.6)                     | 15 (31.3)        | 12 (17.4)   | 19 (37.3) | 11 (22.4)     | 140 (23.6)             | 258   |
| Osmotic laxatives                                                                           | 4 (2.9)                    | 1 (1.7)   | 3 (2.6)                       | 4 (8.3)          | 4 (5.8)     | 0 (0)     | 1 (2.0)       | 2 (0.3)                | 19    |
| Inflatable laxatives                                                                        | 0 (0)                      | 1 (1.7)   | 1 (0.9)                       | 2 (4.2)          | 6 (8.7)     | 0 (0)     | 0 (0)         | 4 (0.7)                | 14    |
| Chloride channel activator/<br>guanylate cyclase C agonists/<br>ileal bile acid transporter | 0 (0)                      | 1 (1.7)   | 0 (0)                         | 1 (2.1)          | 5 (7.3)     | 0 (0)     | 1 (2.0)       | 6 (1.0)                | 14    |
| Polyethylene glycol                                                                         | 2 (1.4)                    | 1 (1.7)   | 0 (0)                         | 1 (2.1)          | 3 (4.3)     | 0 (0)     | 0 (0)         | 4 (0.7)                | 11    |
| Other                                                                                       | 10 (7.1)                   | 6 (10.3)  | 6 (5.3)                       | 3 (6.3)          | 7 (10.1)    | 12 (23.5) | 3 (6.1)       | 54 (9.1)               | 101   |
| Unknown, oral                                                                               | 5 (3.6)                    | 2 (3.4)   | 6 (5.3)                       | 6 (12.5)         | 2 (2.9)     | 2 (3.9)   | 17 (34.7)     | 99 (16.7)              | 139   |

PPI, proton pump inhibitor; PCAB, potassium ion-competitive acid blocker.  
Values are presented as n (%) or n.

**Supplementary Table 7.** Prescription Rate of Laxatives in Participants Who Had Proton Pump Inhibitors or Potassium Ion-competitive Acid Blockers

| Laxative use | With GERD (n = 216) | Without GERD (n = 336) | Total (N = 552) |
|--------------|---------------------|------------------------|-----------------|
| Yes          | 71 (32.9)           | 82 (24.4)              | 153             |
| No           | 145 (67.1)          | 254 (75.6)             | 399             |

GERD, gastroesophageal reflux disease.  
Values are presented as n (%) or n.

**Supplementary Table 8.** Number of Participants With Chronic Constipation and Gastroesophageal Reflux Disease (With Gastroesophageal Reflux Disease Defined as Frequency Scale for the Symptoms Score  $\geq 8$ )

| Constipation status                             | GERD (defined as FSSG score $\geq 8$ ) |              |        | OR [95% CI]       |
|-------------------------------------------------|----------------------------------------|--------------|--------|-------------------|
|                                                 | With GERD                              | Without GERD | Total  |                   |
| Chronic constipation according to the guideline |                                        |              |        |                   |
| Yes                                             | 1734 (61.6)                            | 2070 (28.8)  | 3804   | 3.97 [3.63, 4.35] |
| No                                              | 1079 (38.4)                            | 5117 (71.2)  | 6196   |                   |
| Total                                           | 2813                                   | 7187         | 10 000 |                   |

FSSG, Frequency Scale for the Symptoms of GERD; GERD, gastroesophageal reflux disease.  
 Values are presented as n (%) or n.
